# Supplementary material
Source: PubMed Central journal article supplement (PMC3339638)
Supplement: supp_en.2011-2099_EN-11-2099figs2.pdf [file supp_en.2011-2099_EN-11-2099figs2.pdf]

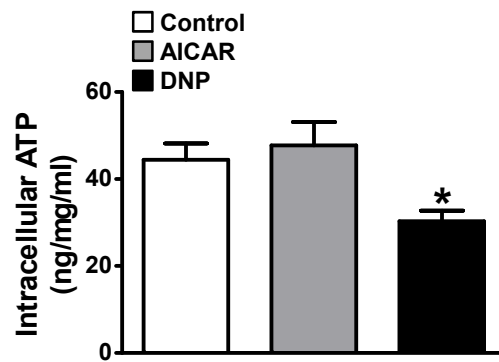

**Supplemental Fig. 1 AMPK activation by ATP-independent and ATP-dependent mechanism.**

Myotubes were left untreated or treated with AICAR (1 mM, 45 min) or DNP (200  $\mu$ M, 30 min). Intracellular ATP content was measured using a luminescence ATP detection assay system as described in *Materials and Methods*. ATP concentrations were normalized for protein concentration determined by the Bradford method. Values are means  $\pm$ SE of 4 independent experiments. \* $P < 0.05$  vs. control group.

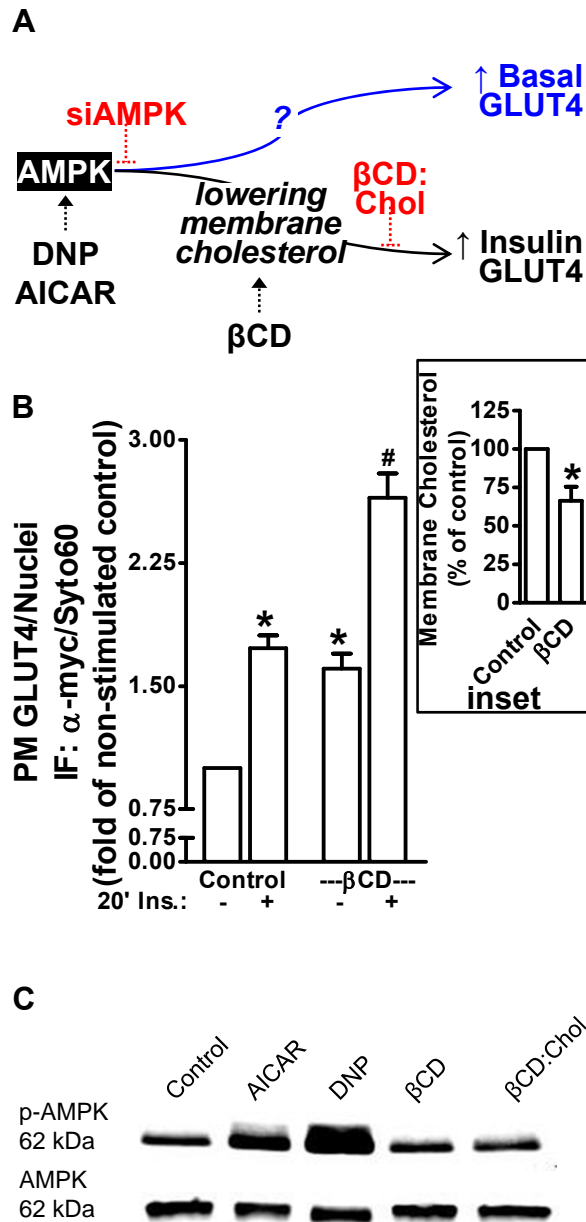

**Supplemental Fig. 2 Proposed model of divergent membrane cholesterol-independent and dependent AMPK pathways regulating basal and insulin-stimulated PM GLUT4 content.**

Proposed model of divergent AMPK pathways highlighting that the insulin-like action of AICAR and DNP on mobilizing GLUT4 to the cell surface results from a cholesterol-independent mechanism; whereas membrane cholesterol lowering by AICAR and DNP contributes to the enhancement of insulin regulation of the transporter (A). Basal and insulin-stimulated (100 nM, 20 min) plasma membrane GLUT4 contents (B) were determined in myotubes treated as described in Fig. 2 in the absence or presence of  $\beta$ CD (2.5 mM, 30 min). Membrane cholesterol contents (panel B inset) were determined as described in Fig. 4. Myotubes were left untreated or treated with AICAR (1 mM, 45 min), DNP (200  $\mu$ M, 30 min),  $\beta$ CD (2.5 mM, 30 min) or  $\beta$ CD:Chol (1 mM 8:1 molar ratio, 45 min). Cell lysates were subjected to SDS-PAGE and immunoblot analyses using anti-phospho AMPK and anti-pan AMPK antibodies (C). Representative immunoblots are shown from 3 independent experiments. Values are means  $\pm$  SE of 4-5 independent experiments. \* $P$ <0.05 vs. control (or control-basal) groups; # $P$ <0.05 vs. control-insulin group.
